## **MS Western, a Method of Multiplexed Absolute Protein Quantification is a Practical Alternative to Western Blotting**

Mukesh Kumar<sup>1</sup>, Shai R. Joseph<sup>1</sup>, Martina Augsburg<sup>2</sup>, Aliona Bogdanova<sup>1</sup>, David Drechsel<sup>1,6</sup>, Nadine L. Vastenhouw<sup>1</sup>, Frank Buchholz<sup>1,2,3,4</sup>, Marc Gentzel<sup>1,5</sup> and Andrej Shevchenko<sup>1#</sup>

<sup>1</sup>Max Planck Institute of Molecular Cell Biology and Genetics, Pfotenhauerstr. 108, 01307 Dresden, Germany

<sup>2</sup>Medical Systems Biology, UCC, Medical Faculty Carl Gustav Carus, TU Dresden, 01307 Dresden, Germany

<sup>3</sup>German Cancer Research Center (DKFZ), Heidelberg and German Cancer Consortium (DKTK) partner site Dresden, 01307 Dresden, Germany

<sup>4</sup>National Center for Tumor Diseases (NCT), University Hospital Carl Gustav Carus, TU Dresden, 01307 Dresden, Germany

<sup>5</sup>Present address: Center for Molecular and Cellular Bioengineering, TU Dresden, 01307 Germany

<sup>6</sup>Present address: IMP Research Institute of Molecular Pathology, 1030 Vienna, Austria

# Corresponding author

**Absolute quantification of proteins elucidates the molecular composition, regulation and dynamics of multiprotein assemblies and networks. Here we report on a method termed MS Western that accurately determines the molar content of dozens of user-selected proteins at the low femtomole level in whole cell or tissue lysates without metabolic or chemical labelling or using specific antibodies. MS Western relies upon GeLC-MS/MS and quantifies proteins by *in-gel* co-digestion with an isotopically labelled protein chimera composed of concatenated proteotypic peptides. It requires no purification of the chimera and relates the molar abundance of all proteotypic peptides to a single reference protein. In comparative experiments, MS Western outperformed immunofluorescence Western blotting by the protein detection specificity, linear dynamic range and sensitivity of protein quantification. To validate MS Western in an *in vivo* experiment, we quantified the molar content of zebrafish core histones H2A, H2B, H3 and H4 during ten stages of early embryogenesis. Accurate quantification (CV<10%) corroborated the anticipated histones equimolar stoichiometry and revealed an unexpected trend in their total abundance.**

**Keywords:** quantitative proteomics; GeLC-MS/MS; QconCAT; absolute quantification of proteins; Western blotting; zebrafish embryogenesis

**Running title:** Absolute quantification of proteins by MS Western

## INTRODUCTION

Despite well-known technical limitations and numerous application pitfalls, Western blotting (WB) remains one of the most widely used tools in analytical biochemistry (reviewed in (1-7)). WB conveniently provides a semi-quantitative estimate of the protein abundance directly from crude cell or tissue extracts. Quantification capabilities of WB, particularly its linear dynamic range, have been improved by using secondary antibodies with fluorescence labelling and advanced systems for the optical readout of the abundance of recognized protein bands (8). This, however, has not alleviated the crucial requirement of having antibodies with high and specific affinity towards target proteins (9).

Within the last two decades a variety of mass spectrometry based methods for targeted absolute protein quantification relying on isotopically labelled peptide / protein standards (*e.g.* AQUA (10), PSAQ (11), FLEXIQuant (12), prEST (13) or QconCAT (14, 15)); relative proteome-wide quantification using chemical or metabolic labelling (*e.g.* ICAT (16), TMT (17), iTRAQ (18, 19), SILAC (20), Super SILAC (21)), as well as label-free proteome quantification (22-26) have been developed. As an alternative to WB of SDS-extracted membrane proteins Arnott *et al* developed a method of SRM quantification of pre-selected pairs of ICAT-labeled peptides enriched by affinity chromatography prior LC-MS/MS (27). However, these and other developments did not replace WB *en masse*, although it had been suggested that the field would strongly benefit from routine use of a targeted antibody-independent quantification of proteins by mass spectrometry (28).

Because of the attomole sensitivity, protein identification confidence, quantification accuracy, analyses throughput (reviewed in (29)) and, last but not least, the availability of high-end mass spectrometers proteomics has had a major impact on the entire field of molecular and cell biology. However, it is often perceived as a tool for monitoring global proteome-wide perturbations that is too cumbersome and inflexible for hypothesis-driven studies encompassing a limited selection of proteins that need to be quantified in many biological conditions. High costs and technical hurdles of

proteome-wide labelling of tissues or entire model organisms with stable isotopes; cumbersome preparation of clean protein extracts; inconsistent quality of synthetic peptide standards; biased quantification of membrane and modified proteins are common bottlenecks in targeted proteomics applications.

Here we report on a method termed *MS Western* that provides multiplexed absolute (in moles) antibody-free quantification of dozens of user-selected proteins from unlabelled cell and tissue lysates that combines sample preparation versatility of conventional WB with the specificity, accuracy and sensitivity of LC-MS/MS.

## **EXPERIMENTAL PROCEDURES**

### **Chemicals and reagents**

All reagents were of the analytical grade or better quality. LC-MS grade solvents were purchased from Fisher Scientific (Waltham, MA); formic acid (FA) from Merck (Darmstadt, Germany), Complete Ultra Protease Inhibitors from Roche (Mannheim, Germany); Trypsin Gold, mass spectrometry grade, from Promega (Madison, USA); restriction enzymes and buffers from New England BioLabs (Ipswich, MA); benzonase from Novagen (Gibbstown, NJ); other common chemicals and buffers were from Sigma-Aldrich (Munich, Germany). Pre-cast 4 – 20 % % gradient 1-mm thick polyacrylamide mini-gels were from Anamed Elektrophorese (Rodau, Germany).

### **Protein standards and amino acids**

Lyophilized protein standards: bovine serum albumin (BSA), glycogen phosphorylase (GP), alcohol dehydrogenase (ADH), enolase (ENO) and ubiquitin (UBI) were purchased from Sigma-Aldrich; ampoules of Pierce BSA standard from Thermo Fisher Scientific (Waltham, MA); recombinant human histones from New England BioLabs (Ipswich, MA); amino acids from AppliChem

(Darmstadt, Germany); isotopically labelled  $^{13}\text{C}_6^{15}\text{N}_4$ -L-arginine and  $^{13}\text{C}_6$ -L-lysine from Silantes (Munich, Germany).

### **Protein analysis by GeLC-MS/MS**

To visualize protein lanes gels were stained with Coomassie and gel slabs covering the mass range of *ca* +/- 20 kDa off the Mr of target proteins were excised. Proteins were *in-gel* digested with trypsin (30) and recovered tryptic peptides were analyzed by nanoflow LC-MS/MS (31); full details on the GeLC-MS/MS procedure are provided in Supplementary Methods. Mass spectra were acquired in data-dependent acquisition (DDA) mode on LTQ Orbitrap Velos or Q Exactive HF mass spectrometers, both from Thermo Fisher Scientific (Bremen, Germany). DDA settings are provided in Supplementary Table S5.

### **Data processing**

To match peptides to target proteins, MS/MS spectra were searched by Mascot v.2.2.04 software (Matrix Science, London, UK) against a customized database containing sequences of all target proteins, human keratins and porcine trypsin (in total, 234 protein entries). We applied precursor mass tolerance of 5 ppm; fragment mass tolerance of 0.6 Da and 0.03Da for LTQ Orbitrap Velos and Q Exactive HF instruments, respectively; fixed modification: carbamidomethyl (C); variable modifications: acetyl (protein N-terminus), oxidation (M); labels:  $^{13}\text{C}(6)$  (K) and  $^{13}\text{C}(6)^{15}\text{N}(4)$  (R); cleavage specificity: trypsin, with up to 2 missed cleavages allowed. Peptides having the ions score above 20 were accepted (significance threshold  $p < 0.05$ ) and the quantification was only carried out if both light and heavy forms of the same peptide were identified by MS/MS and retention time of their XIC peaks matched. Xcalibur (Thermo Fisher Scientific) and Progenesis LC-MS v.4.1 (Nonlinear Dynamics, UK) software were used for extracting peptide features from LC-MS/MS datasets.

## **Experimental Design and Statistical Rationale**

For benchmarking and validation of MS Western we designed four chimeric proteins (CP01 to CP04) having MW in the range of 35 to 264 kDa and comprising proteotypic peptides from proteins of different properties (*e.g.* cytosolic, transmembrane), size (from 8 to 2065 kDa) and organismal origin.

Knock-down experiments in HeLa cells were performed in biological triplicates and analyzed by LC-MS/MS in technical duplicates. MS Western benchmarking experiments were performed in technical duplicates for each of 15 samples made by successive dilution of a total protein extract of HeLa cells. Core histones were quantified in zebrafish embryos in three biological replicates and LC-MS/MS run in technical duplicates. Wherever applicable, we provide standard deviation of the mean (mean  $\pm$ SD), coefficient of variance (CV) and robust coefficient of variance (rCV) calculated as 1.4826 times the median absolute deviation (32).

### **Quantification of proteins spiked into an *E.coli* lysate**

Stock solutions of protein standards: BSA, GP, ENO, ADH and UBI were quantified by amino acid analysis (Functional Genomics Center Zurich, Switzerland). The overnight culture (OD<sub>600</sub>=1.5) of *E.coli* strain BL21 (DE3) T1 pRARE was pelleted by centrifugation at 5000 rpm for 5 minutes at 4°C (JLA 8.1000 centrifuge from Beckman Coulter, Brea CA). The cell pellet was re-suspended in 2x PBS, lysed in the presence of protease inhibitors and the total protein content was quantified using Pierce BCA Protein Assay Kit (Thermo Fisher Scientific). Equimolar mixtures containing 25 fmol to 25 pmol of each protein standard were spiked into 50  $\mu$ g of an *E.coli* protein extract and subjected to 1D SDS PAGE as above. Upon electrophoresis gel slices corresponding to the apparent MWs of spiked proteins were excised, co-digested with gel bands of CP01 and recovered peptides quantified by LC-MS/MS.

### **Absolute quantification of recombinant histone H4**

Aliquots of a stock solution of recombinant human H4 with the concentration of 1mg/ml were appropriately diluted and mixed with equal volumes of 2x Laemmli buffer. Three samples containing 0.05, 0.1 and 0.3  $\mu$ g of histone H4 were subjected to 1D SDS PAGE as described above. In parallel, the CP02 and an aliquot containing 0.066  $\mu$ g of Pierce BSA standard were run on a separate gel. The excised bands of histone H4, CP02 and BSA were mixed and co-digested with trypsin. After *in-gel* digestion and extraction, tryptic peptides were reconstituted in 46  $\mu$ L of 5% aqueous FA and 5  $\mu$ L were analyzed by LC-MS/MS.

### **Knock-down experiments in HeLa cells**

AKT1, CAT, PLK1, and TUBA4A genes were knock-down (KD) in HeLa cells using RNAi (Eupheria Biotech, Dresden, Germany). KD experiments were performed in triplicate; renilla luciferase transfections as a RNAi specificity control were performed on a separate plate. Further details are provided in Supplementary Methods; details on antibodies and RNAi probes are in Supplementary Tables S6 and S7, respectively.

### **Comparison of protein quantification by MS Western and LI-COR Odyssey.**

HeLa cells were cultured in Dulbecco's modified Eagle's medium supplemented with 10% fetal calf serum and 1% penicillin-streptomycin (Gibco™ Life Technologies).  $1 \times 10^7$  HeLa cells were re-suspended in 100  $\mu$ L RIPA buffer containing Complete Protease Inhibitor Cocktail, EDTA-free (Roche). Equal volume of 2x Laemmli buffer was added and incubated at 80°C for 15 minutes with intermittent vortexing. The supernatant was transferred to a new vial and further diluted with RIPA / 2x Laemmli buffer (1:1, v/v). Samples obtained at each dilution step were subjected to 1D SDS PAGE on two different gels. One gel was analyzed by LI-COR Odyssey and another by MS Western using bands of CP03 and BSA as standard and reference proteins, respectively. In each dilution step an equivalent amount of target proteins was digested and injected into LC-MS/MS or imaged by the Odyssey.

### **Absolute quantification of histones in zebrafish embryos by MS Western**

Wild-type (TLAB) zebrafish embryos were dechorionated immediately upon fertilization, synchronized and allowed to develop to the desired stage at 28°C. Ten embryos per developmental stage (except five embryos for 1-cell stage) were manually deyolked and snap frozen in liquid nitrogen. Samples were boiled in Laemmli buffer at 98°C for 10 minutes and subjected to 1D SDS PAGE. A single gel slab containing histones was excised from each sample lane and histones were quantified by MS Western using bands of CP02 and BSA as standard and reference proteins, respectively. 10% of the total amount of recovered tryptic peptides was injected into LC-MS/MS.

### **Absolute quantification of histones in zebrafish embryos by LI-COR Odyssey**

Zebrafish embryos were collected at the specified developmental stages ( $n = 5$  for H3 and H2B;  $n=10$  for H2A and H4). Embryos were processed as described above and total protein extracts were subjected to 1D SDS PAGE. Proteins were blotted onto a nitrocellulose membrane (GE Life Sciences). Primary antibodies (Supplementary Table S8) were incubated at room temperature for 1 hour or at 4°C overnight; secondary antibodies (Supplementary Table S8) were incubated at room temperature for 45 min. Proteins were quantified by LI-COR Odyssey using tubulin as a loading control. Standards of recombinant human histones were used for making calibration plots for the quantification of corresponding zebrafish homologues.

### **Data deposition**

Proteomics data have been deposited at the ProteomeXchange Consortium *via* the PRIDE (33) partner repository with the dataset identifier PXD005654 and doi: 10.6019/PXD005654. Temporary login for reviewers is provided under username: reviewer55654@ebi.ac.uk and password: HgrBxHbm.

## **RESULTS AND DISCUSSION**



## **MS Western: protein quantification concept and workflow**

Effectively, MS Western merges the three established analytical approaches: GeLC-MS/MS (30, 31, 34-36); proteotypic peptides clubbed with “top  $N$  peptides” protein quantification (31, 37-42) and QconCAT synthesis of isotopically labelled protein chimeras comprising concatenated sequences of proteotypic peptides (14, 15, 32). We termed this method as MS Western to underscore that it is targeted (rather than global), quantitative, relies on SDS PAGE of crude protein extracts and in this way is in line with classical Western. But, because of mass spectrometry readout, it requires no blotting and, most importantly, no antibodies.

To quantify a protein by MS Western we first selected a few (typically, three to six) proteotypic peptides (37, 39) in preliminary GeLC-MS/MS experiments, which also verified the position of bands of target proteins at the electrophoresis lanes separating crude protein extracts. However, peptides could be also picked from collections of LC-MS/MS spectra (43, 44) or predicted by software (45, 46).

In the same way, we further selected proteotypic peptides from two reference proteins – in this work we used glycogen phosphorylase (GP) and bovine serum albumin (BSA). Peptide sequences from the target and reference proteins were concatenated *in-silico* in an arbitrary order except that, for convenience, peptides from the same protein were positioned successively. The entire stretch of peptide sequences was flanked at the N- and C-termini with the sequences of twin-strep-tag followed by a 3C protease cleavage site and His-tag, respectively (Fig. 1). These tags protect target peptides from exopeptidase degradation and, only if deemed necessary, could be used to enrich the expressed chimera from a whole cell lysate. Altogether we designed four project-specific chimera proteins (CP) ranging in size from 35 to 264 kDa that encoded, in total, more than 300 proteotypic peptides from 58 individual proteins (Supplementary Fig. S1, S3, S5 and S7). The design rationale was the same as in QconCAT proteins (14, 15) and here we use CP acronym solely for the

presentation clarity. All CPs made in this work were highly expressed (Supplementary Fig. S2, S4, S6 and S8) and incorporated more than 99% of heavy arginine and lysine residues (Supplementary Fig. S9).

In contrast to the relative (fold change) quantification, absolute (in moles) quantification critically depends on the exactly known concentration of internal standard(s). In QconCAT and related methods it is usually determined by the amino acid analysis or photo- or colorimetric assays (15). This, however, requires highly purified CPs and is prone to batch-to-batch variations and inter-laboratory inconsistency. Instead, MS Western utilizes a simple workaround solution that requires no CP purification (Fig. 2).

To quantify proteins of interest a cell or tissue lysate was subjected to 1D SDS PAGE. Gel slab(s) approximately matching the Mr of target protein(s) were excised and mixed with bands of the CP excised from a lane with *E.coli* lysate and of the reference protein (*e.g.* BSA). The three bands were co-digested with trypsin, recovered peptides analyzed by LC-MS/MS and proteins quantified by considering the abundance of XIC peaks of matching pairs of light and heavy peptides. The molar quantity of each target protein was inferred from the molar content of the CP, which in turn was referenced to the known molar amount of BSA. In this way, there was no need in purifying CPs and its quantification relied on the parallel independent comparison of the abundance of multiple reporter peptides. Note that gel bands of CP, BSA and the gel slab with target protein(s) were *in-gel* digested together, light and heavy peptides were extracted from the same digest and quantified in the same LC-MS/MS experiment. In all experiments absolute (molar) quantities of all CPs were referenced to the same commercial protein standard (Pierce BSA) with the guaranteed chemical purity, stock concentration and batch-to-batch reproducibility.

MS Western protocol should be adjusted according to the Mr and abundance of target proteins. Coomassie staining were not intended to visualize the bands of target proteins. Instead, proteins were excised within larger (typically, +/- 20 kDa) gel slabs (Figure 2C) centred at their

expected Mr and verified by preliminary GeLC-MS/MS. If a target protein smeared across several gel slices, molar abundances (but not raw peak areas) of each peptide in each slice should be summed up. For optimal quantification the abundance ratio between light and heavy peptides should be adjusted by considering the isotopic purity (99%) of heavy arginine and lysine amino acids, rather than by a large linear dynamic range of Orbitrap analyzers (47). We typically co-digested *ca.* 100 fmols of CPs, depending on the abundance of target proteins. If required, the detection sensitivity could be further enhanced by using DDA with an inclusion list of expected *m/z* of target peptide precursors or by parallel reaction monitoring (PRM) (48).

Taken together, a vastly simplified MS Western workflow offers several experimental advantages. Firstly, both CP and target proteins are independently quantified in the same experiment by several (usually, three to six) proteotypic peptides and it is expected that they should produce quantitatively consistent determinations (31, 40). Secondly, MS Western protocol only requires femtomole amounts of isotopically labelled standards. All four CPs were produced with high yield (Supplementary Fig. S2A, S4A, S6A and S8A) and *ca* 1 mL of the cell culture provided standards in hundred picomole quantities. In our limited experience none of the expression experiments failed or low yield of CPs required their enrichment prior to MS Western quantification. We did not maintain pre-quantified CP stocks, but simply excised their bands directly from a gel loaded with *E.coli* lysate. Thirdly, since proteins were solubilized in 4% SDS and analyzed by GeLC-MS/MS the quantification was not affected by the solubility or purity of CPs and target proteins. SDS PAGE also improved both the dynamic range and sensitivity of peptide detection. In contrast to a gel-free “mass western” approach by Arnott *et al* (27) that is also compatible with SDS extraction of proteins our method enabled their absolute (rather than relative) quantification (also including membrane proteins) and used no chemical derivatization and /or multistep clean-up of heavy and light pairs of proteotypic peptides. And finally, in contrast to conventional WB, MS Western does not rely on antibodies and ordering a synthetic gene at the current price level of *ca* 10 to 15 Eur per peptide with

guaranteed quality and a few week delivery time is simply incomparable with costs and efforts required for generating and validation of reliable monoclonal antibodies.

### **Validation and properties of MS Western**

Although the concept of MS Western looked appealing, a major question remained if *in-gel* co-digestion of relatively pure CPs, of target protein(s) embedded into a polyacrylamide gel matrix together with abundant background and of pure BSA standard delivered the same yield of proteotypic peptides?

To answer this question, we designed and expressed *ca.* 42 kDa chimera CP01 (Supplementary Fig. S1 and S2A) comprising 31 proteotypic peptides from five commercially available proteins: GP, BSA, ENO, ADH and UBI (Supplementary Table S1). GeLC-MS/MS of its gel band yielded 100% sequence coverage (Supplementary Fig. S2B) and confirmed > 99% isotopic labelling efficiency (Supplementary Fig. S9).

Gel bands of each of these five target proteins were co-digested with the band of CP01. The extracted peptides were analyzed by LC-MS/MS and relative abundances of light (normalized to all light) and heavy (normalized to all heavy) proteotypic peptides were compared (Supplementary Fig. S10). We observed that within 31 peptide pairs the relative abundances varied by less than 10% (Supplementary Fig. S10). Indeed, prior *in-gel* digestion CPs as well as target and reference proteins were fully denatured first by SDS and then by acetic acid / methanol during Coomassie staining. Also, because of pre-separation of crude extracts by SDS PAGE, only a small fraction of a background proteome was co-digested together with target protein(s). In line with previous findings (32), we observed no noticeable impact of the size and composition of both target protein and CPs and speculated that SDS PAGE and *in-gel* digestion might even relax the constraints (49) applied for the selection of proteotypic peptides.

In only a few instances (Supplementary Fig. S10B and S11F) not all relative abundances matched because of incomplete trypsin cleavage or post-translational modifications (PTMs). However, irrespectively of why they mismatched, “problematic” pairs of peptide could be spotted by their discordant relative abundances and disregarded from the protein quantification.

We next asked if the likeness of peptide relative abundances in *in-gel* digests of CP and of target proteins warranted their accurate molar quantification. As a test bed, we used the CP02 comprising peptides from the four core histones H2A, H2B, H3 and H4 from *D. rerio* (Supplementary Fig. S3, S4 and Supplementary Table S2). We also obtained a standard of human recombinant histone H4 supplied as a stock solution with the known concentration. Human and zebrafish histones H4 share 99% full-length sequence identity (Supplementary Fig. S14) and we tested if human H4 could be quantified using identical peptides from CP02 whose molar abundance was referenced to the BSA standard. Three aliquots containing different amounts of human H4 were subjected to SDS PAGE and quantified by MS Western. Relative abundances of light peptides from BSA and histone H4 and corresponding heavy peptides from CP02 were in a good agreement (Fig.3A and 3B, respectively). Relative abundances of one BSA (QTALVELLK) and one histone H4 (TVTAMDVVYALK) peptides mismatched because of incomplete cleavage of proteins. When the areas of XIC peaks of miscleaved peptides were added into the calculation, the expected relative abundances were restored. Next for each peptide and each amount of histone H4 we calculated the ratio of the relative abundances of their light and heavy forms. If relative abundances of both forms remain the same then these ratios should be close to the value of 1.0 consistently with our findings (Fig. 3C). Altogether in three independent experiments MS Western quantification relying on five proteotypic peptides (Fig. 3B) correctly determined different molar amounts of histone H4 loaded on the gel (Fig.3D).

### **Benchmarking protein quantification by MS Western**

We benchmarked MS Western protocol in three ways. First, we checked if its linear dynamic range was affected by a concomitant protein background. Second, we tested if both WB and MS Western produced quantitatively concordant determinations of endogenous proteins in whole cell lysates. Finally, we benchmarked MS Western sensitivity and dynamic range against currently the most advanced quantitative Western blotting system LI-COR Odyssey (further termed as Odyssey) that relies upon near-infrared immunofluorescent readout of the abundance of antibodies recognizing the target proteins.

We first analyzed a series of eleven samples containing 25 fmol to 25 pmol of an equimolar mixture of five proteins (GP, BSA, ENO, ADH and UBI) spiked into 50  $\mu$ g of *E.coli* protein extract. Each sample was subjected to SDS PAGE and the five proteins were quantified by MS Western by co-digesting their bands with the band of CP01. Closely migrating bands of ENO and ADH ( $\Delta$ Mr ca 10 kDa) were excised and digested together. Calibration plots were linear over the entire range of spiked amounts of proteins (Fig.4A).

Next we tested if WB on LI-COR Odyssey and MS Western would provide concordant quantification of endogenous proteins in whole cell lysates. In contrast to MS Western, pure protein standards are required for the absolute quantification by the Odyssey because slopes of calibration plots relying on integral intensities of visualized bands differ between individual proteins. Therefore, to compare the two methods, we depleted several proteins in HeLa cells by RNAi. We then analyzed the same extracts from control and KD cells by the Odyssey and by MS Western and checked if they reported concordant changes in protein abundances.

For MS Western quantification we designed a 72 kDa chimera protein CP03 comprising 47 proteotypic peptides from six human proteins: CAT, TUBA, PLK1, AKT1, GAPDH and PTEN (Supplementary Fig. S5, S6 and Supplementary Table S3) for each of which commercial monoclonal antibodies are available. Both Odyssey and MS Western determined quantitatively concordant levels of endogenous TUB, PLK1, CAT and AKT1 in KD-cells as compared to the luciferase control

(Supplementary Fig. S12). Interestingly, MS Western could separately quantify the relative abundances of TUBA4A and TUBA1A sharing 96% of the full-length sequence identity. The abundance of both proteins was affected by RNAi at the same extent, however they were not distinguished by the Odyssey (Supplementary Fig S12).

We used the same proteins to benchmark the dynamic range and sensitivity of MS Western quantification in comparison to the Odyssey. To this end, samples of successively diluted total protein extract from HeLa cells were loaded on two different gels. We adjusted the loaded volumes such that, for each dilution, the same amount of protein extract (here exemplified as an equivalent number of extracted cells) was subjected to Odyssey imaging and injected into the LC-MS/MS. Therefore protein molar amounts (as determined by MS Western) and integrated intensities of protein bands (determined by Odyssey) could be correlated with no further adjustment (Fig. 4B-C).

Fig. 4D and 4E compare the dilution plots of TUBA quantified by MS Western (as TUBA1A) and by the Odyssey (as TUBA1A and TUBA4A), respectively. In WB experiments GAPDH served as a loading control and its abundance followed the dilution of HeLa extract. In MS Western an equal amount of CP03 was co-digested with each sample and therefore its constant abundance evidenced the analyses consistency. Compared to the Odyssey, MS Western showed at least 60-fold better sensitivity (down to 1.5 fmol of TUBA1A) along with higher dynamic range (>16000-fold) and excellent linearity ( $r^2 = 0.9983$ ) (Fig.4E). In the middle of the plot (Fig.4D) the Odyssey also showed good linearity towards both GAPDH and TUBA1A /4A. However, at lower loadings the Odyssey did not recognize the target proteins, while at higher loadings the system incorrectly integrated the abundance of irregular-shaped protein bands and lost the response linearity.

We note that the MS Western workflow does not enhance the detection sensitivity compared to conventional GeLC-MS/MS and might fail to quantify very low abundant proteins that still might be detectable by classical Western. Contrary to WB that is often pestered with false positives, MS Western seems to be more prone to false negatives if overwhelming background abolishes the

ionization of proteotypic peptides and / or if target proteins are extremely low abundant. It is therefore advisable to start with preliminary GeLC-MS/MS experiments before designing CPs to make sure that the target proteins are detectable and select the optimal constellation of proteotypic peptides.

### **Absolute quantification of histones in zebrafish embryos**

Histones make up the basic unit of chromatin, the nucleosome. Each nucleosome consists of 147 base pairs of DNA wrapped around a histone octamer comprising two copies of each of the four core histones: H2A, H2B, H3, and H4. Embryos inherit histones from the mother (50) and WB analyses suggested that, despite embryo growth, histones level is stable during the early stages of development in both *Xenopus* (51) and zebrafish (52), but increases rapidly upon genome activation. We reasoned that predictable stoichiometry and time course of their content make embryonic histones a good model for validating MS Western in *in vivo* experiments.

We employed MS Western to determine the molar content of H2A, H2B, H3 and H4 in zebrafish embryos at ten developmental stages ranging from 1-cell stage to Shield stage. Zebrafish embryos (1-cell stage  $n=5$ ; otherwise  $n=10$ ) were collected and (except for 1-cell stage) manually deyolked (53). Proteins extracted from deyolked embryos were subjected to SDS PAGE. Slabs corresponding to the Mr range of *ca.* 5 to 25 kDa that contained all core histones were excised from each gel and histones were quantified using the bands of CP02 and BSA. We observed that ratios of relative abundances of light and heavy forms of proteotypic peptides (Fig. 5A) varied by less than 10% in all embryogenesis stages and concluded that endogenous peptides were not harbouring PTMs. Accurate (CV <10%) absolute quantification of four histones (Fig 5B; Supplementary Table S9) revealed that, in contrast to previous reports, histones content steadily increased already during the early stages of development. This suggests that in zebrafish embryos mothers deposit both histone



proteins and corresponding mRNA that are translated before the onset of zygotic transcription around the 1000-cell stage. As expected, after genome activation, histones content increased more rapidly.

Molar quantities of individual histones were consistent with the expected equimolar stoichiometry (Fig. 5C). At the very early stages of development the histones stoichiometry slightly, yet consistently deviated from the equimolar ratios, however that were closely approached at the later stages. We note that MS Western quantification only reflected the total content of histones, irrespectively if they were assembled into a nucleosome or associated with chaperones (50, 54).

We also quantified histones by the Odyssey (Fig. 5D) and compared it to MS Western (Supplementary Fig. S13). We found that the quantification by Odyssey was generally inconclusive and stoichiometry between individual histones was nowhere close to the expected equimolar ratios. This, once again, highlighted that WB quantification is extremely sensitive towards the quality of antibodies and protein standards.

Taken together, MS Western enabled precise and consistent quantification of the molar content of four core histones at the sub-picomole per embryo level directly from total protein extracts and revealed their unexpected individual dynamics during early embryogenesis.

## **CONCLUSIONS AND PERSPECTIVES**

We argue that MS Western is a practical and technically simple solution for the accurate multiplex targeted absolute quantification of proteins. In MS Western workflow SDS PAGE circumvents the limited solubility of both target and chimera proteins; it also removes interfering buffers and detergents, including SDS. Pre-separation of total protein extracts improves the dynamic range and sensitivity of quantification. Protein quantification relies on multiple proteotypic peptides and the concordance between the relative abundances of matching pairs of heavy and light peptides provides

independent validation of the quantification consistency. However, one conceptual limitation of MS Western is that it is difficult to predict if a particular low abundant protein (*e.g.* a transcription factor) could be detectable by GeLC-MS/MS. In our experience the detection of proteins by classic Western blotting or projecting their abundances from transcriptomics did not substitute preliminary analyses by GeLC-MS/MS and it is advisable to establish the scope of detectable proteins before planning systematic MS Western experiments. However, once target proteins have been detected, their accurate absolute multiplexed quantification becomes a straightforward technical task.

In the future it would be interesting to explore if a single, reasonably large CP could cover all essential members of metabolic and/ or signalling pathways and allow us to relate their molar abundances to molar concentrations of corresponding metabolites. It would also be intriguing to explore if CP could be used as templates to incorporate site-specific post-translational modifications by some chemical or genetic means.

## **AUTHOR CONTRIBUTIONS**

MK, MG and AS designed the study. MK, AB, and DD designed and produced protein chimeras. MK performed MS Western benchmarking and validation experiments and quantified zebrafish histones. SRJ and NLV performed experiments with zebrafish embryos. MA and FB performed KD experiments in HeLa cells. MK and AS wrote the draft that was jointly revised by all co-authors.

## **ACKNOWLEDGEMENTS**

Work in AS and NLV laboratories was supported by MPG core funding. AS laboratory was supported by KFO249 and TRR83 (Project A17) grants from Deutsche Forschungsgemeinschaft; NLV laboratory by Human Frontier Science Program Career Development Award

(CDA00060/2012). Work in the FB laboratory was supported by the Excellence Initiative of the German Federal and State Governments (Institutional Strategy, measure 'support the best ZUK 64'). MK and SRJ are recipients of IMPRS PhD student fellowship. The authors are grateful for the members of AS, NV and FB laboratories for useful discussion and expert technical support. We are particularly grateful for Dr. Henrik Thomas (MPI CBG) for developing useful data processing tools.

## REFERENCES

1. Gorr, T.A., Vogel, J. (2015) Western blotting revisited: critical perusal of underappreciated technical issues. *Proteomics Clin Appl* **9**, 396-405.
2. Gassmann, M., Grenacher, B., Rohde, B., Vogel, J. (2009) Quantifying Western blots: pitfalls of densitometry. *Electrophoresis* **30**, 1845-1855.
3. Baker, M. (2015) Reproducibility crisis: Blame it on the antibodies. *Nature* **521**, 274-276.
4. Janes, K.A. (2015) An analysis of critical factors for quantitative immunoblotting. *Sci Signal* **8**, rs2.
5. Bordeaux, J., Welsh, A., Agarwal, S., Killiam, E., Baquero, M., Hanna, J. *et al.* (2010) Antibody validation. *Biotechniques* **48**, 197-209.
6. Uhlen, M., Bandrowski, A., Carr, S., Edwards, A., Ellenberg, J., Lundberg, E. *et al.* (2016) A proposal for validation of antibodies. *Nat Methods* **13**, 823-827.
7. Egelhofer, T.A., Minoda, A., Klugman, S., Lee, K., Kolasinska-Zwierz, P., Alekseyenko, A.A. *et al.* (2011) An assessment of histone-modification antibody quality. *Nat Struct Mol Biol* **18**, 91-93.
8. Eaton, S.L., Hurtado, M.L., Oldknow, K.J., Graham, L.C., Marchant, T.W., Gillingwater, T.H. *et al.* (2014) A guide to modern quantitative fluorescent western blotting with troubleshooting strategies. *J Vis Exp*, e52099.
9. Gilda, J.E., Ghosh, R., Cheah, J.X., West, T.M., Bodine, S.C., Gomes, A.V. (2015) Western blotting inaccuracies with unverified antibodies: need for a Western blotting minimal reporting standard (WBMRS). *PLoS One* **10**, e0135392
10. Gerber, S.A., Rush, J., Stemman, O., Kirschner, M.W., Gygi, S.P. (2003) Absolute quantification of proteins and phosphoproteins from cell lysates by tandem MS. *Proc Nat Acad Sci USA* **100**, 6940-6945.
11. Brun, V., Dupuis, A., Adrait, A., Marcellin, M., Thomas, D., Court, M. *et al.* (2007) Isotope-labeled protein standards: toward absolute quantitative proteomics. *Mol Cell Proteomics* **6**, 2139-2149.
12. Singh, S., Springer, M., Steen, J., Kirschner, M.W., Steen, H. (2009) FLEXIQuant: a novel tool for the absolute quantification of proteins, and the simultaneous identification and quantification of potentially modified peptides. *J Proteome Res* **8**, 2201-2210.
13. Zeiler, M., Straube, W.L., Lundberg, E., Uhlen, M., Mann, M. (2012) A Protein Epitope Signature Tag (PrEST) library allows SILAC-based absolute quantification and multiplexed determination of protein copy numbers in cell lines. *Mol Cell Proteomics* **11**, O111 009613.

14. Beynon, R.J., Doherty, M.K., Pratt, J.M., Gaskell, S.J. (2005) Multiplexed absolute quantification in proteomics using artificial QCAT proteins of concatenated signature peptides. *Nat Methods* **2**, 587-589.
15. Pratt, J.M., Simpson, D.M., Doherty, M.K., Rivers, J., Gaskell, S.J., Beynon, R.J. (2006) Multiplexed absolute quantification for proteomics using concatenated signature peptides encoded by QconCAT genes. *Nat Protoc* **1**, 1029-1043.
16. Gygi, S.P., Rist, B., Gerber, S.A., Turecek, F., Gelb, M.H., Aebersold, R. (1999) Quantitative analysis of complex protein mixtures using isotope-coded affinity tags. *Nat Biotechnol* **17**, 994-999.
17. Thompson, A., Schafer, J., Kuhn, K., Kienle, S., Schwarz, J., Schmidt, G. *et al.* (2003) Tandem mass tags: a novel quantification strategy for comparative analysis of complex protein mixtures by MS/MS. *Anal Chem* **75**, 1895-1904.
18. Ross, P.L., Huang, Y.N., Marchese, J.N., Williamson, B., Parker, K., Hattan, S. *et al.* (2004) Multiplexed protein quantitation in *Saccharomyces cerevisiae* using amine-reactive isobaric tagging reagents. *Mol Cell Proteomics* **3**, 1154-1169.
19. Wiese, S., Reidegeld, K.A., Meyer, H.E., Warscheid, B. (2007) Protein labeling by iTRAQ: a new tool for quantitative mass spectrometry in proteome research. *Proteomics* **7**, 340-350.
20. Ong, S.E., Blagoev, B., Kratchmarova, I., Kristensen, D.B., Steen, H., Pandey, A. *et al.* (2002) Stable isotope labeling by amino acids in cell culture, SILAC, as a simple and accurate approach to expression proteomics. *Mol Cell Proteomics* **1**, 376-386.
21. Geiger, T., Cox, J., Ostasiewicz, P., Wisniewski, J.R., Mann, M. (2010) Super-SILAC mix for quantitative proteomics of human tumor tissue. *Nat Methods* **7**, 383-385.
22. Chelius, D., Bondarenko, P.V. (2002) Quantitative profiling of proteins in complex mixtures using liquid chromatography and mass spectrometry. *J Proteome Res* **1**, 317-323.
23. Bondarenko, P.V., Chelius, D., Shaler, T.A. (2002) Identification and relative quantitation of protein mixtures by enzymatic digestion followed by capillary reversed-phase liquid chromatography-tandem mass spectrometry. *Anal Chem* **74**, 4741-4749.
24. Ishihama, Y., Oda, Y., Tabata, T., Sato, T., Nagasu, T., Rappsilber, J. *et al.* (2005) Exponentially modified protein abundance index (emPAI) for estimation of absolute protein amount in proteomics by the number of sequenced peptides per protein. *Mol Cell Proteomics* **4**, 1265-1272.
25. Gao, B.B., Stuart, L., Feener, E.P. (2008) Label-free quantitative analysis of 1D-PAGE LC/MS/MS proteome: Application on angiotensin II stimulated smooth muscle cells secretome. *Mol Cell Proteomics*.
26. Wisniewski, J.R., Hein, M.Y., Cox, J., Mann, M. (2014) A "proteomic ruler" for protein copy number and concentration estimation without spike-in standards. *Mol Cell Proteomics* **13**, 3497-3506.

27. Arnott, D., Kishiyama, A., Luis, E.A., Ludlum, S.G., Marsters, J.C., Stults, J.T. (2002) Selective detection of membrane proteins without antibodies - A mass spectrometric version of the Western blot. *Molecular & Cellular Proteomics* **1**, 148-156.
28. Mann, M. (2008) Can proteomics retire the western blot? *J Proteome Res* **7**, 3065.
29. Aebersold, R., Mann, M. (2016) Mass-spectrometric exploration of proteome structure and function. *Nature* **537**, 347-355.
30. Shevchenko, A., Tomas, H., Havlis, J., Olsen, J.V., Mann, M. (2006) In-gel digestion for mass spectrometric characterization of proteins and proteomes. *Nat Protoc* **1**, 2856-2860.
31. Vasilj, A., Gentzel, M., Ueberham, E., Gebhardt, R., Shevchenko, A. (2012) Tissue proteomics by one-dimensional gel electrophoresis combined with label-free protein quantification. *J Proteome Res* **11**, 3680-3689.
32. Lawless, C., Holman, S.W., Brownridge, P., Lanthaler, K., Harman, V.M., Watkins, R. *et al.* (2016) Direct and absolute quantification of over 1800 yeast proteins via selected reaction monitoring. *Mol Cell Proteomics* **15**, 1309-1322.
33. Vizcaíno, J., Csordas, A., del-Toro, N., Dianes, J., Griss, J., Lavidas, I. *et al.* (2016) 2016 update of the PRIDE database and related tools. *Nucleic Acids Res* **44**, D447-D456.
34. Cutillas, P.R., Biber, J., Marks, J., Jacob, R., Stieger, B., Cramer, R. *et al.* (2004) Proteomic analysis of plasma membrane vesicles isolated from the rat renal cortex. *Proteomics* **5**, 101-112.
35. Piersma, S.R., Warmoes, M.O., de Wit, M., de Reus, I., Knol, J.C., Jimenez, C.R. (2013) Whole gel processing procedure for GeLC-MS/MS based proteomics. *Proteome Sci* **11**, 17.
36. Tanca, A., Pagnozzi, D., Burrai, G.P., Polinas, M., Uzzau, S., Antuofermo, E. *et al.* (2012) Comparability of differential proteomics data generated from paired archival fresh-frozen and formalin-fixed samples by GeLC-MS/MS and spectral counting. *J Proteomics* **77**, 561-576.
37. Kuster, B., Schirle, M., Mallick, P., Aebersold, R. (2005) Scoring proteomes with proteotypic peptide probes. *Nat Rev Mol Cell Biol* **6**, 577-583.
38. Craig, R., Cortens, J.P., Beavis, R.C. (2005) The use of proteotypic peptide libraries for protein identification. *Rapid Commun Mass Spectrom* **19**, 1844-1850.
39. Mallick, P., Schirle, M., Chen, S.S., Flory, M.R., Lee, H., Martin, D. *et al.* (2007) Computational prediction of proteotypic peptides for quantitative proteomics. *Nat Biotechnol* **25**, 125-131.
40. Silva, J.C., Gorenstein, M.V., Li, G.Z., Vissers, J.P., Geromanos, S.J. (2006) Absolute quantification of proteins by LCMSE: a virtue of parallel MS acquisition. *Mol Cell Proteomics* **5**, 144-156.
41. Grossmann, J., Roschitzki, B., Panse, C., Fortes, C., Barkow-Oesterreicher, S., Rutishauser, D. *et al.* (2010) Implementation and evaluation of relative and absolute quantification in shotgun proteomics with label-free methods. *J Proteomics* **73**, 1740-1746.

42. Reidel, B., Thompson, J.W., Farsiu, S., Moseley, M.A., Skiba, N.P., Arshavsky, V.Y. (2011) Proteomic profiling of a layered tissue reveals unique glycolytic specializations of photoreceptor cells. *Mol Cell Proteomics* **10**, 1-14.
43. Craig, R., Cortens, J.P., Beavis, R.C. (2004) Open source system for analyzing, validating, and storing protein identification data. *J Proteome Res* **3**, 1234-1242.
44. Desiere, F., Deutsch, E.W., King, N.L., Nesvizhskii, A.I., Mallick, P., Eng, J. *et al.* (2006) The PeptideAtlas project. *Nucleic Acids Res* **34**, D655-658.
45. Lawless, C., Hubbard, S.J. (2012) Prediction of missed proteolytic cleavages for the selection of surrogate peptides for quantitative proteomics. *Omics* **16**, 449-456.
46. Evers, C.E., Lawless, C., Wedge, D.C., Lau, K.W., Gaskell, S.J., Hubbard, S.J. (2011) CONSeQuence: prediction of reference peptides for absolute quantitative proteomics using consensus machine learning approaches. *Mol Cell Proteomics* **10**.
47. Scigelova, M., Makarov, A. (2006) Orbitrap mass analyzer - overview and applications in proteomics. *Proteomics* **6**, 16-21.
48. Bourmaud, A., Gallien, S., Domon, B. (2016) Parallel reaction monitoring using quadrupole-Orbitrap mass spectrometer: Principle and applications. *Proteomics* **16**, 2146-2159.
49. Lowenthal, M.S., Liang, Y.X., Phinney, K.W., Stein, S.E. (2014) Quantitative bottom-up proteomics depends on digestion conditions. *Anal Chem* **86**, 551-558.
50. Marzluff, W.F., Wagner, E.J., Duronio, R.J. (2008) Metabolism and regulation of canonical histone mRNAs: life without a poly(A) tail. *Nat Rev Genet* **9**, 843-854.
51. Amodeo, A.A., Jukam, D., Straight, A.F., Skotheim, J.M. (2015) Histone titration against the genome sets the DNA-to-cytoplasm threshold for the *Xenopus* midblastula transition. *Proc Natl Acad Sci U S A* **112**, E1086-E1095.
52. Vastenhouw, N.L., Zhang, Y., Woods, I.G., Imam, F., Regev, A., Liu, X.S. *et al.* (2010) Chromatin signature of embryonic pluripotency is established during genome activation. *Nature* **464**, 922-U143.
53. Link, V., Shevchenko, A., Heisenberg, C.P. (2006) Proteomics of early zebrafish embryos. *BMC Dev Biol* **6**, 1.
54. Bouleau, A., Desvignes, T., Traverso, J.M., Nguyen, T., Chesnel, T., Fauvel, C. *et al.* (2014) Maternally inherited *npm2* mRNA is crucial for egg developmental competence in zebrafish. *Biol Reprod* **91**, 43.



## Figure Legends

**Fig. 1. Modular organization of chimera proteins (CP) used in MS Western quantification.** Sequences of proteotypic peptides (schematically shown as boxes) from each target protein (colour-coded) are *in-silico* concatenated into a single chimera, flanked with peptide sequences of the reference proteins GP and BSA and with two affinity tags along with a 3C cleavage site.

**Fig. 2. Workflow of the absolute protein quantification by MS Western.** Gel band containing the known amount of the reference protein BSA (A); gel band of CP metabolically labelled with  $^{15}\text{N}$ ,  $^{13}\text{C}$ -Arg and  $^{13}\text{C}$ -Lys (B) and the gel slab excised at the range of expected Mr of the target protein(s) (C) are co-digested with trypsin and recovered peptides analyzed by LC-MS/MS (D). The CP is quantified by comparing the abundances of XIC peaks of unlabelled (from BSA reference) (E) and labelled (from the CP) (F) peptides (G). Next, the amount of target protein is inferred from the ratio of abundances of XIC peaks of matching unlabelled (from the target protein) (H) and labelled (from the CP) (I) proteotypic peptides (J) and from the amount of CP. For clarity, only two (out of several) matching pairs of labelled / unlabelled peptides are shown. A solubilised cell pellet in panel B was subjected to SDS PAGE without prior enrichment of the CP.

**Fig. 3. Validation of MS Western by absolute quantification of recombinant human histone H4.** (A) Relative abundances of light and heavy BSA peptides produced by co-digestion of the bands of BSA and CP02, respectively. (B) Relative abundances of light and heavy peptides produced by co-digestion of the bands of recombinant human H4 and CP02, respectively. (C) Ratio of relative abundances of light and heavy peptides (as in panel B) at three different loadings of histone H4. (D) Loaded and MS Western quantified molar amounts of histone H4. The amount of co-digested CP02 is provided as a reference. Data are presented as mean  $\pm$ SD (panels A and B  $n=3$ ; panels C and D  $n=2$ ).

**Fig. 4. Benchmarking the protein quantification by MS Western against LI-COR Odyssey.** (A) MS Western quantification of proteins spiked into the constant background of *E.coli* lysate. (B) Odyssey image of gels loaded with a successively diluted protein extract from HeLa cells. Bands with green and red fluorescence are TUBA4A/1A and GAPDH (loading control), respectively. (C) Coomassie stained gels with the same dilution series. Gel slabs excised from each lane for MS Western quantification of TUBA1A/4A are boxed. (D) Abundances of TUBA1A/4A from lanes 9,12,13,14,15,16,17 and GAPDH from lanes 5,6,7,8,9,12,13,14,15,16,17,18, 19 from the gel image in panel B as reported by the Odyssey. (E) Molar content of TUBA1A and CP03 quantified by MS Western from slabs excised from lanes 2,3,4,5,6,7,8,9,11,12,13,14,16,17, 18 from the gel in panel C. Lanes 1,10,11,20 and lanes 1, 10, 15 and 20 are MW markers in panels B and C, respectively.

**Fig. 5. Absolute quantification of core histones in zebrafish embryos.** (A) Ratios of relative abundances of light and heavy proteotypic peptides produced from endogenous histones at different developmental stages and from CP02, respectively. (B) Molar content of individual histones per zebrafish embryo as quantified by MS Western. (C) Stoichiometric ratios between the four histones at as determined by MS Western. (D) Histones content quantified by LI-COR Odyssey. Data presented as mean  $\pm$ SD ( $n=3$ ).



**Fig. 1**

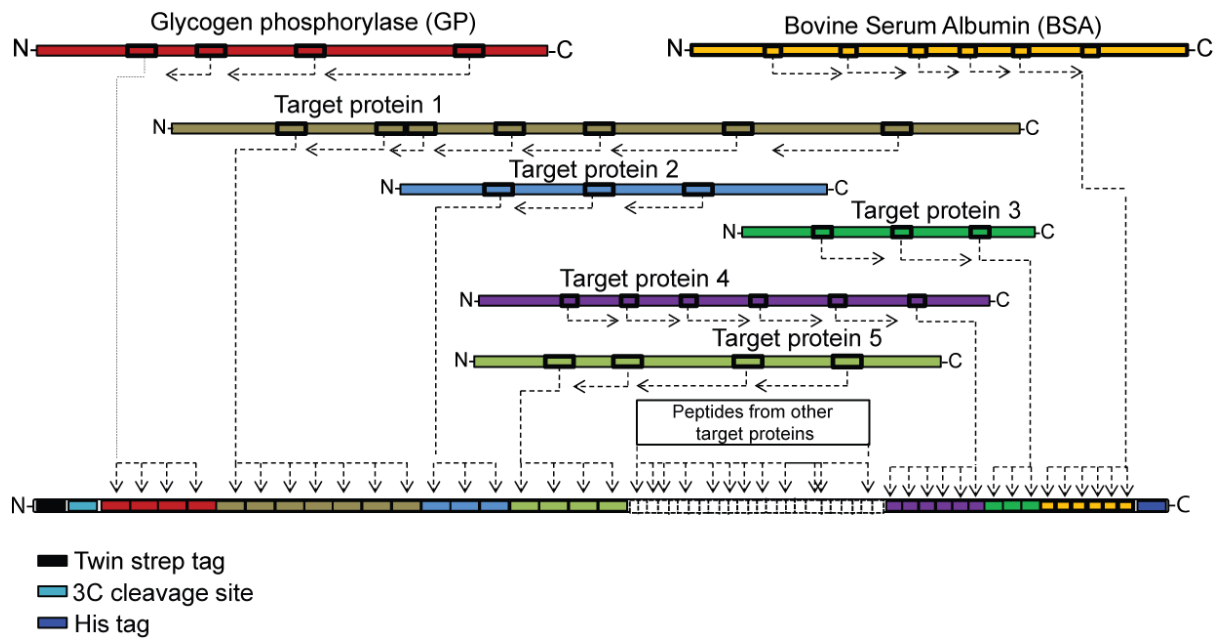

**Fig. 2**

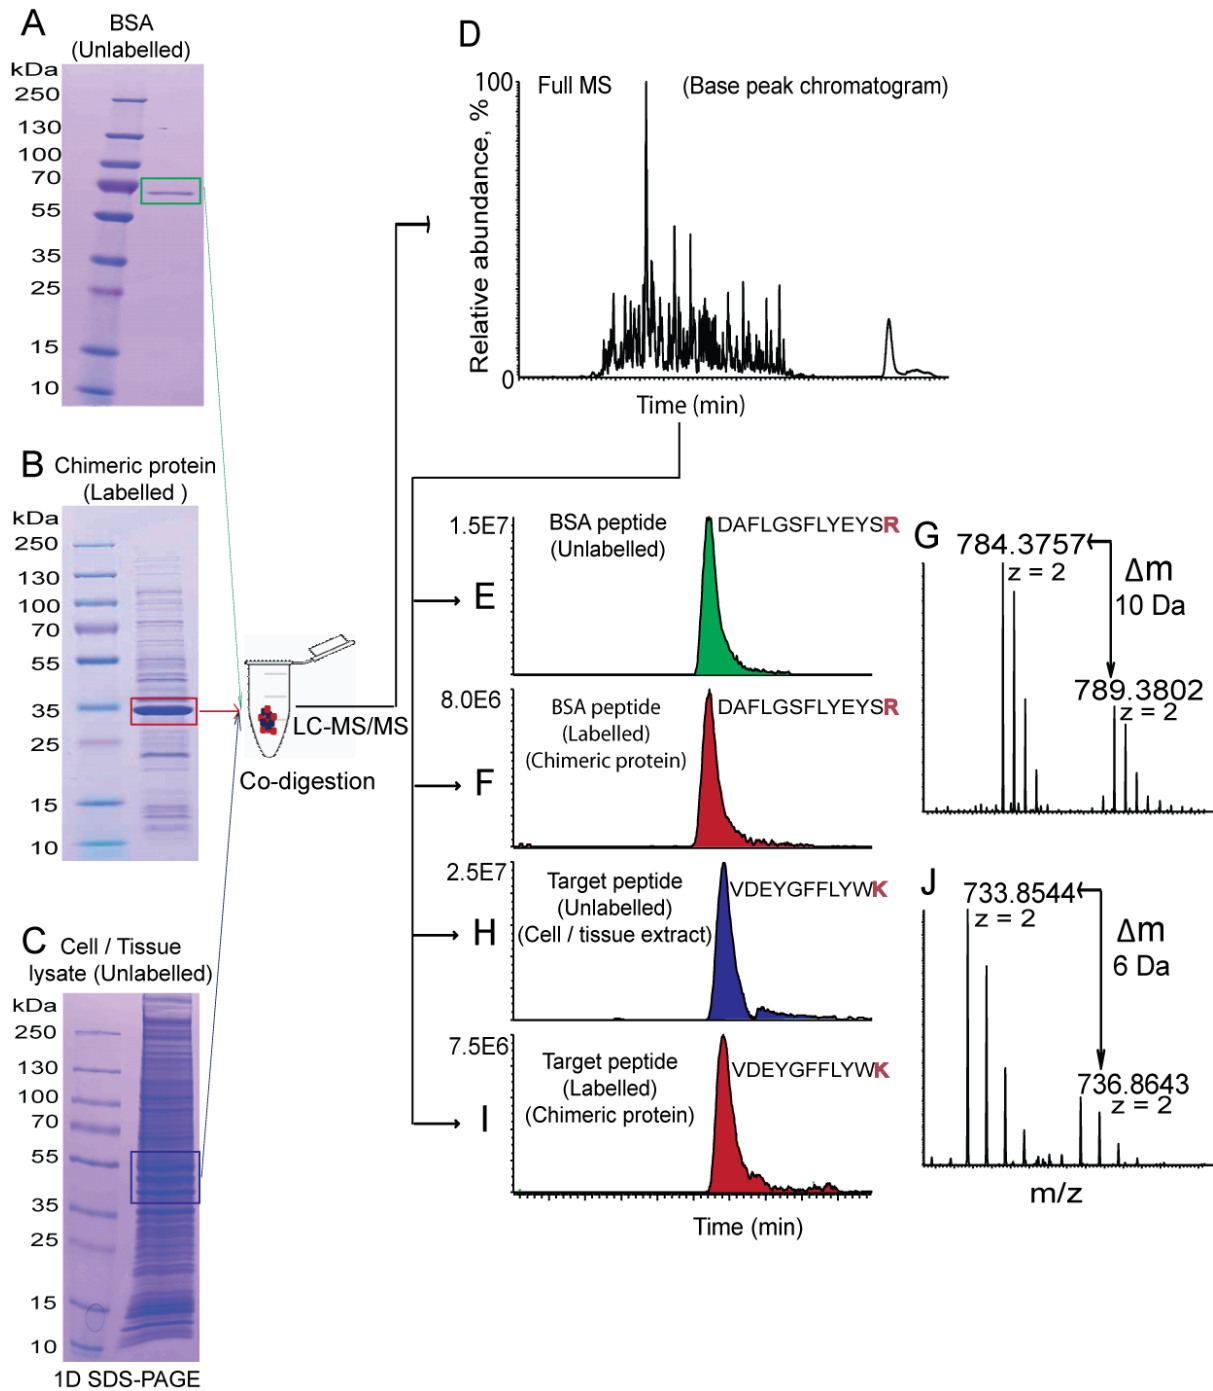

**Fig. 3**

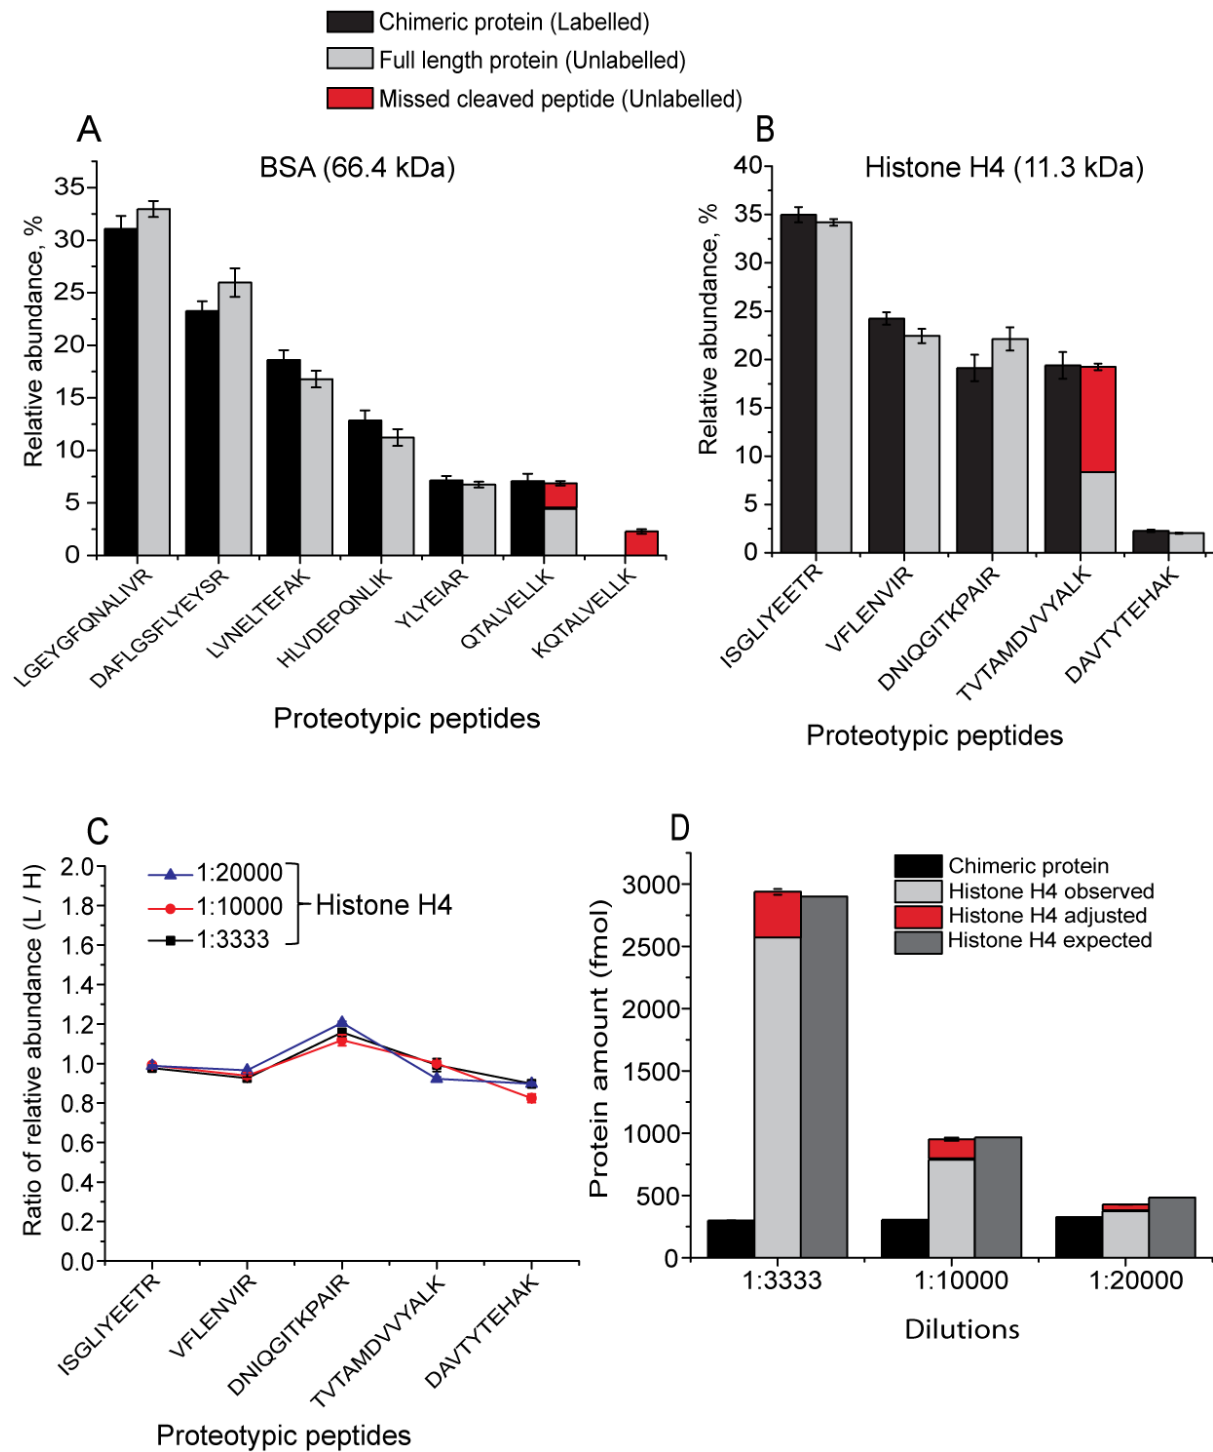

Fig.4

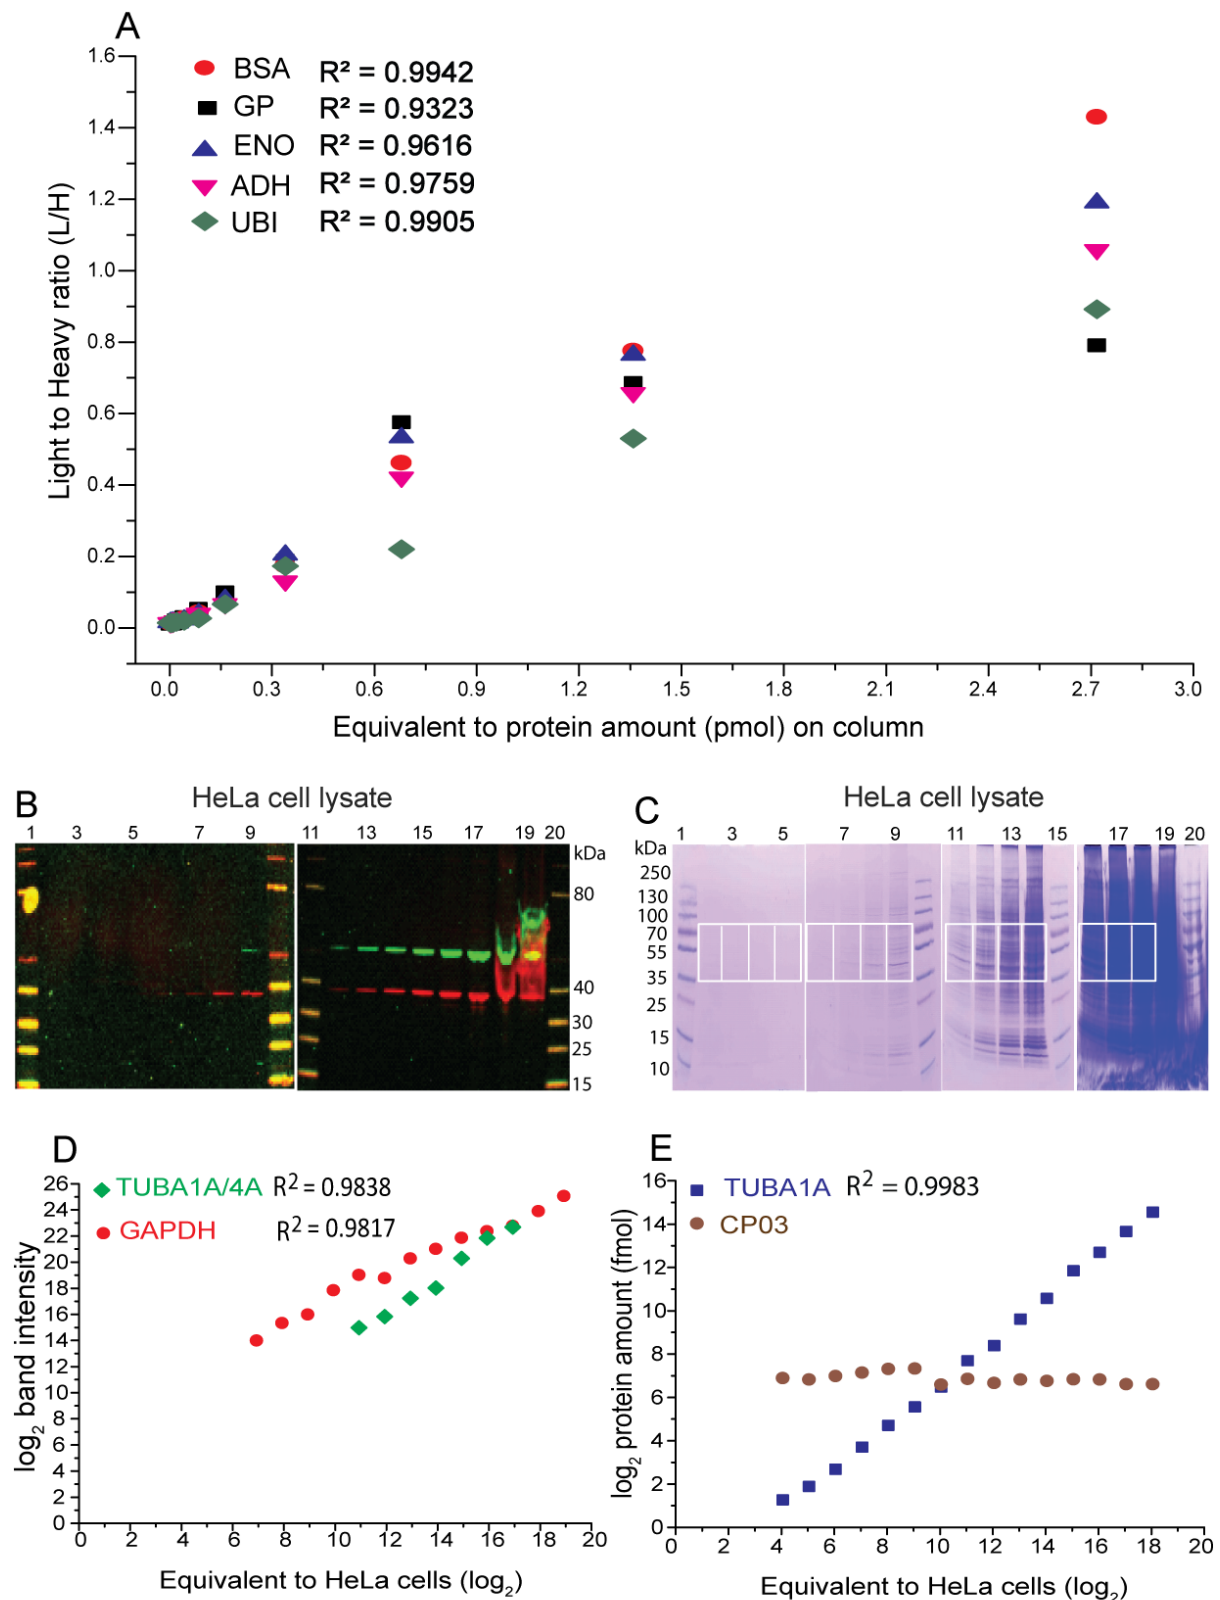

**Fig.5**

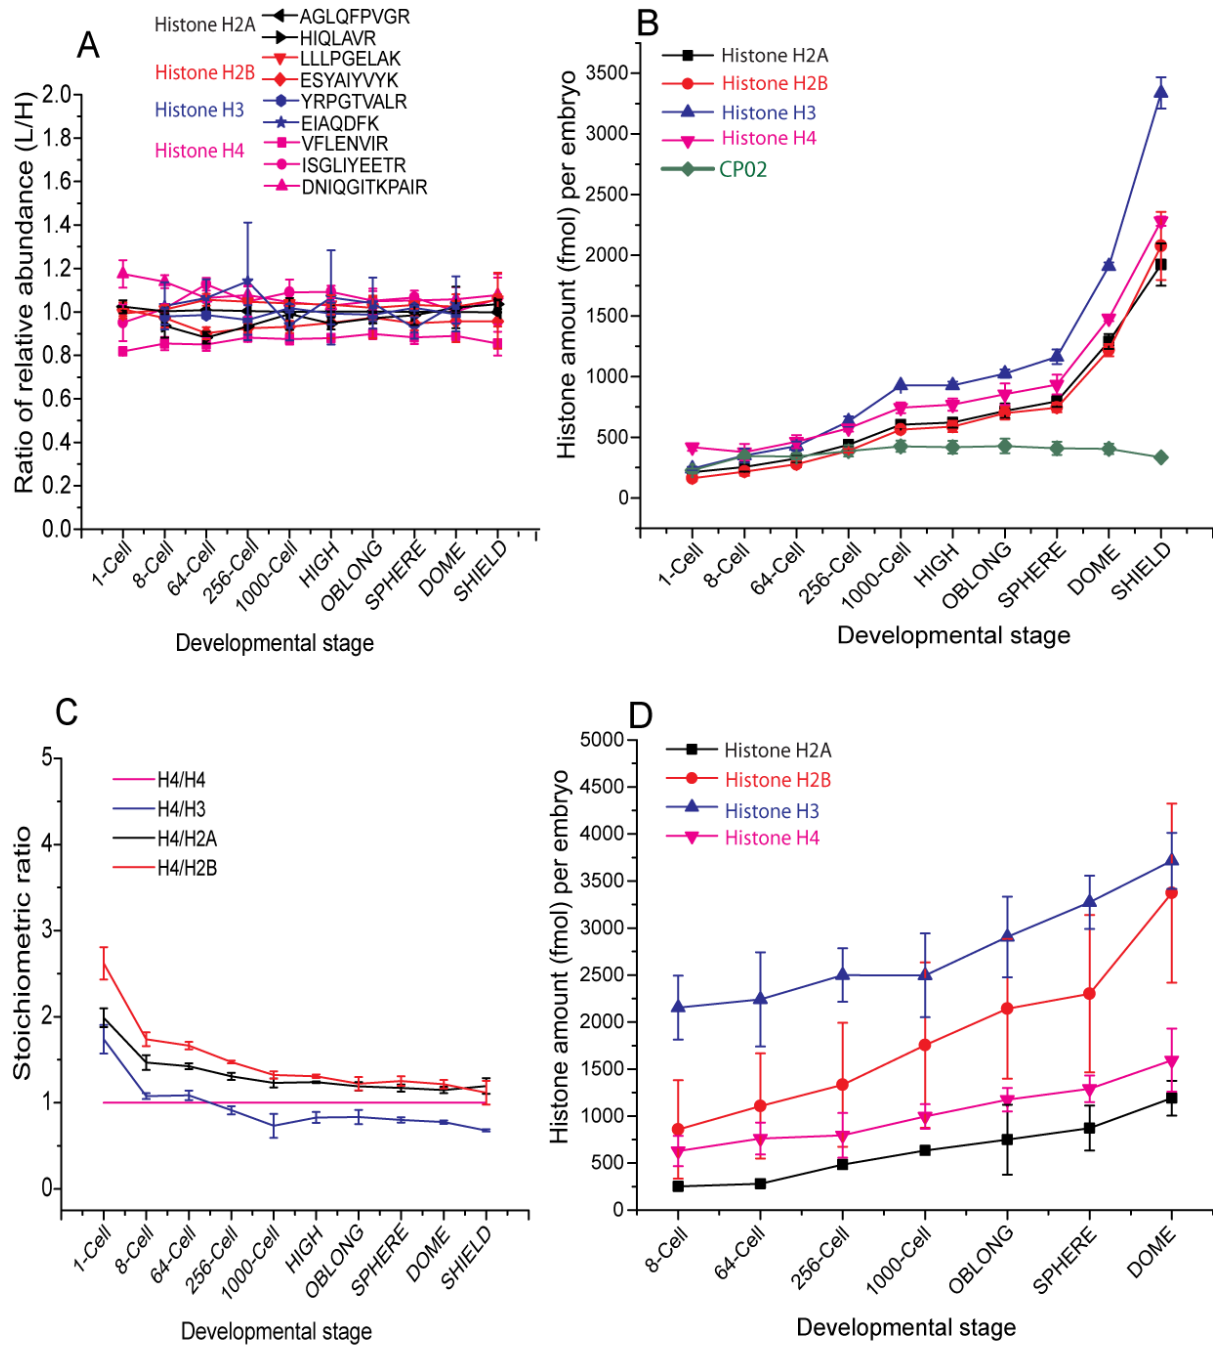

Source: http://biorxiv.org/content/10.1101/156943v1.full.pdf
